# Supplementary material for: Neutrophil extracellular trap formation is increased in psoriasis and induces human β-defensin-2 production in epidermal keratinocytes
Source: PubMed Central journal article supplement (PMC4974609; doi:10.1038/srep31119), 2016-08-05

# **Neutrophil extracellular trap formation is increased in psoriasis and induces human $\beta$ -defensin-2 production in epidermal keratinocytes**

Stephen Chu-Sung Hu, MBBS, M.Phil<sup>1,2</sup>

Hsin-Su Yu, MD, PhD<sup>1,2,3</sup>

Feng-Lin Yen, PhD<sup>4</sup>

Chi-Ling Lin, MD<sup>2,5</sup>

Gwo-Shing Chen, MD, PhD<sup>1,2</sup>

Cheng-Che E. Lan, MD, PhD<sup>1,2,\*</sup>

<sup>1</sup> Department of Dermatology, College of Medicine, Kaohsiung Medical University, Kaohsiung, Taiwan

<sup>2</sup> Department of Dermatology, Kaohsiung Medical University Hospital, Kaohsiung, Taiwan

<sup>3</sup> National Institute of Environmental Health Sciences, National Health Research Institutes, Taipei, Taiwan

<sup>4</sup> College of Pharmacy, Kaohsiung Medical University, Kaohsiung, Taiwan

<sup>5</sup> Department of Dermatology, Kaohsiung Municipal Hsiao-Kang Hospital, Kaohsiung, Taiwan

\* Correspondence: Cheng-Che E. Lan, Department of Dermatology, Kaohsiung Medical University Hospital, No. 100, Tzyou 1st Road, Kaohsiung 807, Taiwan.

Tel: +886 7 3121101

Fax: +886 7 3118894

E-mail: laneric@cc.kmu.edu.tw

**Supplementary Figure 1. (a, b, c) Confocal microscopic images of eczema skin tissue specimens.** Lymphocytes (white arrows) and neutrophils (yellow arrows) were sometimes seen in the epidermis next to keratinocytes (green arrows). However, NETs were not observed (absence of strandlike DNA structures which co-localized with histones and neutrophil elastase) in eczema skin lesions. Skin specimens were stained for DNA (DAPI, blue), histones (red) and neutrophil elastase (NE, green). Scale bars = 10  $\mu$ m.

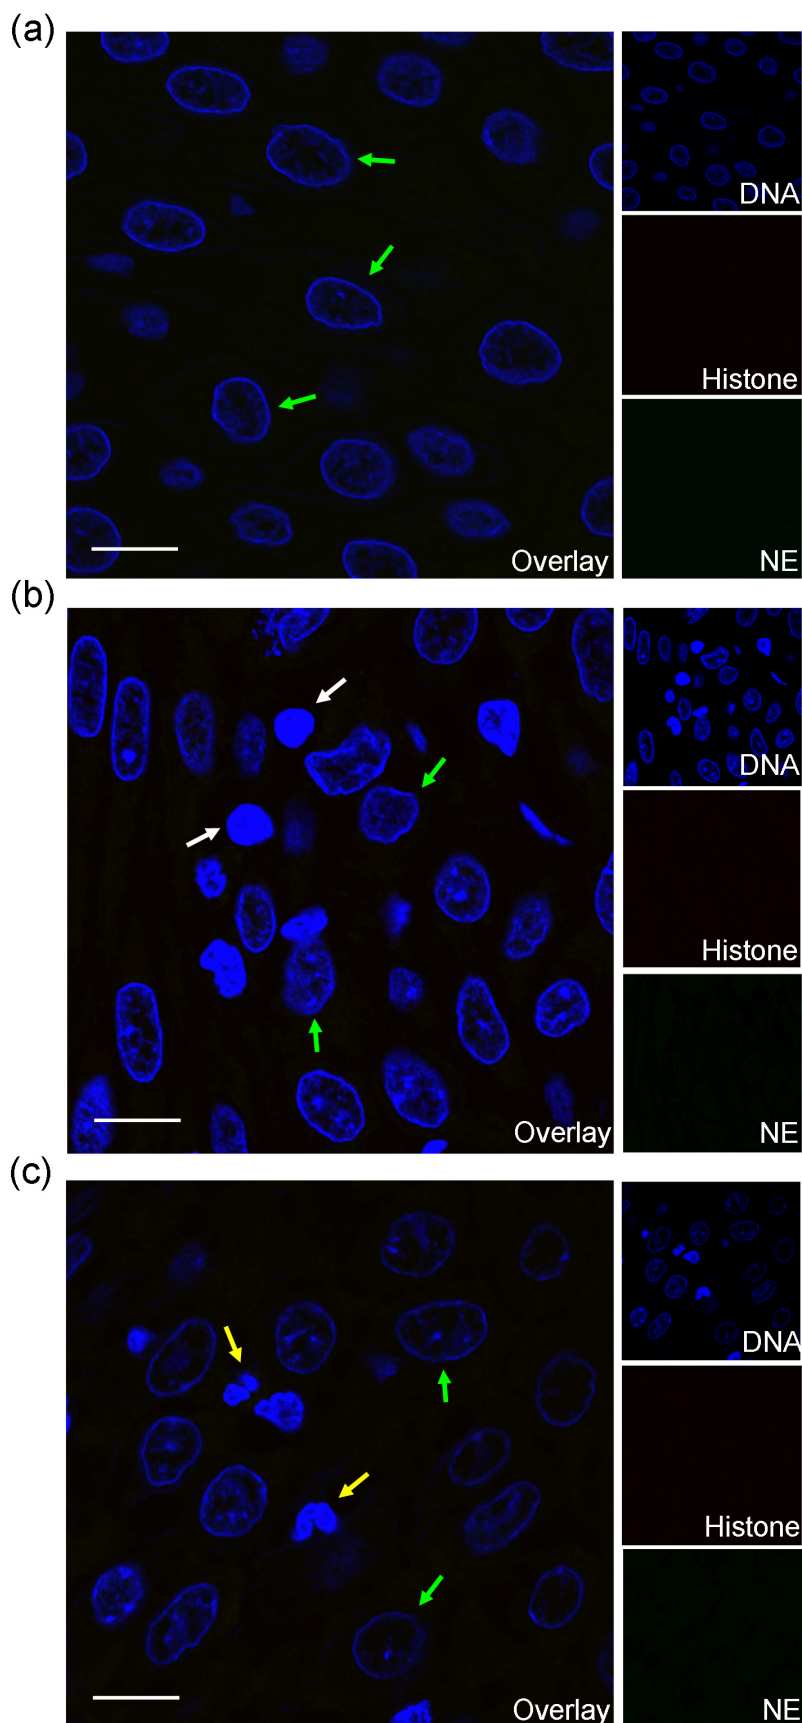

**Supplementary Figure 2. Netting neutrophils had no significant effect on LL37 mRNA expression in epidermal keratinocytes.** Normal human keratinocytes were obtained from adult foreskin, and peripheral blood neutrophils were isolated from 7 healthy controls, 7 eczema patients and 7 psoriasis patients. Normal human keratinocytes were co-cultured for 16 hours with unstimulated control neutrophils (n = 7), control neutrophils stimulated with PMA (n = 7), unstimulated eczema neutrophils (n = 7), eczema neutrophils stimulated with PMA (n = 7), and psoriatic neutrophils (n = 7). LL37 mRNA expression from keratinocytes was determined by real-time quantitative RT-PCR. 1,25-Dihydroxyvitamin D<sub>3</sub> (10<sup>-8</sup> M) was used as a positive control to induce LL37 expression in keratinocytes.

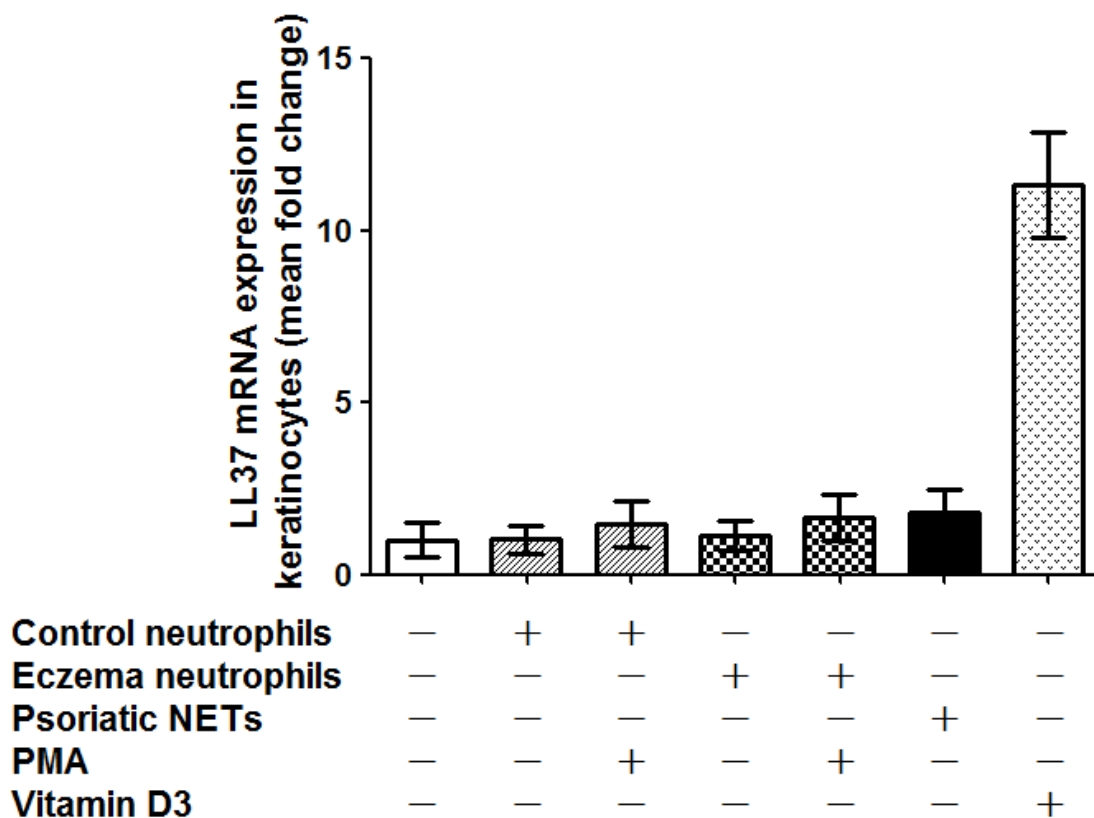

Supplement: srep31119-s1.pdf [file srep31119-s1.pdf]
